# Supplementary material for: Zoledronate Sequential Therapy After Denosumab Discontinuation to Prevent Bone Mineral Density Reduction: A Randomized Clinical Trial
Source: PubMed Central journal article supplement (PMC11555552; doi:10.1001/jamanetworkopen.2024.43899), 2024-11-11
Supplement: jamanetwopen-e2443899-s001.pdf [file jamanetwopen-e2443899-s001.pdf]

# 1 **Research Proposal of National Taiwan University Hospital**

## 2 1. Chinese Project Title

3 以 Zoledronic acid 作為 Denosumab 的接續治療---是否能有效避免 Denosumab 停  
4 藥後快速的骨質流失?

5

## 6 2. English Project Title

7 Sequential therapy after Denosumab by Zoledronic acid --- could bone loss post  
8 discontinuation of Denosumab be prevented?

9

10 3. Principal Investigator : Shau-Huai, Fu (National Taiwan University Hospital,  
11 Yunlin branch)

12 Co-Principal Investigator : Chuan-Ching Huang (National Taiwan University  
13 Hospital, Yunlin branch), Chih-Chien Hung (National Taiwan University Hospital,  
14 Yunlin branch), Chia-Che Lee (National Taiwan University Hospital), Hsuan-Yu  
15 Chen (National Taiwan University Hospital, Hsinchu branch)

16

## 17 4. Research Topic Description

18 Denosumab is a human monoclonal antibody that inhibits Receptor Activator of  
19 Nuclear Factor Kappa B Ligand (RANKL), resulting in an anti-resorptive effect.  
20 Since its market introduction, it has gained increasing market share in Taiwan<sup>2</sup>  
21 due to its simplicity (subcutaneous injection) and less frequent dosing (once every  
22 six months). Patient adherence and persistence with treatment are higher  
23 compared to traditional bisphosphonate medications<sup>1</sup>. Although its preventive  
24 effects on fractures and increase in bone density have demonstrated excellent  
25 performance over a follow-up period of up to ten years<sup>3</sup>, and with minimal side  
26 effects, related studies indicate that the anti-resorptive effect of denosumab is  
27 reversible. After discontinuation, patients experience a rapid decline in bone  
28 density, sometimes returning to pre-treatment levels within just one year<sup>4</sup>. In  
29 addition to the rapid decline in bone density, there have been numerous case  
30 reports indicating that discontinuation of denosumab may lead to severe rebound  
31 effects and multiple vertebral compression fractures<sup>6-8</sup>. However, based on  
32 previous research, despite higher persistence with treatment for patients receiving

33 Prolia (Denosumab) compared to traditional oral bisphosphonates, with only 62%  
34 drug adherence two years into treatment<sup>5</sup>, the long-term efficacy of Denosumab is  
35 compromised in the context of decreasing medication adherence. Therefore, how  
36 to effectively consolidate the increased bone density after a period of Denosumab  
37 treatment, preventing rapid bone density loss due to factors such as poor  
38 adherence, persistence, or other health-related issues, becomes an important and  
39 unresolved issue.

40 The current research on the post-discontinuation consolidation effects of  
41 Denosumab treatment remains quite limited. In 2012, Freemantle et al. conducted  
42 a study indicating that in a group switching from Prolia (Denosumab) to Fosamax  
43 (Alendronate) for one year after one year of Prolia use, bone turnover markers  
44 slightly increased, but bone density did not significantly decrease, and even  
45 remained stable<sup>1</sup>. However, the primary focus of that study was on adherence and  
46 persistence, with a relatively short duration of only one year. Additionally, the  
47 chosen medication was a less potent oral bisphosphonate, leaving the  
48 aforementioned issues still requiring further investigation. In 2015, Leder et al.  
49 reported findings from the DATA-Switch study, revealing that if patients switch  
50 from 2 years of Denosumab to 2 years of Teriparatide treatment, a decrease in  
51 bone density was observed in the hip and wrist regions compared to values after 2  
52 years of Denosumab treatment. Simultaneously, relevant bone turnover markers  
53 increased<sup>9</sup>. However, due to restrictions on Teriparatide reimbursement by the  
54 Taiwan National Health Insurance Bureau, limited to patients with later-stage  
55 fractures, and the overall higher cost of treatment compared to anti-resorptive  
56 drugs, discussing the continuity of Denosumab with Teriparatide is not practical in  
57 the routine clinical setting in Taiwan. Furthermore, among anti-resorptive drugs,  
58 the mechanisms of action differ between bisphosphonates, which directly target  
59 osteoclasts, and the monoclonal antibody Denosumab. Past studies have shown  
60 that bisphosphonates maintain bone density effectively after discontinuation<sup>10,11</sup>,  
61 with Zoledronic acid, due to its long duration of action and a dosing interval of up  
62 to 1 year, mitigating the impact of patient adherence. Additionally, Zoledronic  
63 acid can effectively inhibit bone turnover markers even six months after  
64 discontinuation, maintaining bone density<sup>12</sup>. Some case studies suggest that using  
65 Zoledronic acid as a follow-up treatment to Denosumab may partially protect  
66 against rapid bone loss<sup>13,14</sup>. The study aims to conduct a randomized controlled  
67 trial to examine whether using Zoledronic acid as a follow-up treatment to  
68 Denosumab can prevent rapid bone loss after discontinuation of Denosumab.

69

70 5. Study Objectives

71 This study aims to investigate whether using Zoledronic acid (Aclasta) after  
72 discontinuation of Prolia (Denosumab) can prevent bone loss and avoid increased  
73 bone metabolism.

74

75 Primary outcome:

76 1. Changes in lumbar spine, total hip and femoral neck bone mineral density (BMD)  
77 from baseline to one year and two years

78 Secondary outcomes:

79 1. Changes of C-terminal telopeptide of type I collagen (CTX)

80 2. Changes of propeptide of procollagen type I (P1NP)

81 3. Incidence of clinical osteoporotic fracture

## 82 6. Research Methods and Procedures

### 83 6.1. Subject Selection Criteria.

84 Inclusion criteria:

85 Post-menopausal women and men aged 50 years and over, who had consistently  
86 received biannual denosumab treatment for at least two years

87 Exclusion criteria:

88 - Secondary osteoporosis

89 - Metabolic bone diseases

90 - Cancer

91 - Ongoing steroid therapy

92 - Hormone replacement therapy

93 - Current use of any medications affecting bone metabolism

94 - Prior use of any non-denosumab osteoporosis treatment

95 - Glomerular filtration rate less than <35 mL/min

96 - Allergy to zoledronic acid

97 - Low blood calcium

98 - Any other contraindications to the use of zoledronic acid

99 - Age greater than 80 years

100

### 101 6.2. Assessment Items

#### 102 6.2.1 Basic Information:

103 Age, gender, height, weight, medical history, fracture history, original bone  
104 density examination records.

#### 105 6.2.2 Clinical Records:

106 Any side effects and newly occurring fractures during the follow-up treatment  
107 period.

#### 108 6.2.3 Blood Tests:

109 C-terminal telopeptide of type I collagen (CTX) & Propeptide of procollagen  
110 type I (P1NP): Blood samples will be collected for bone turnover markers (CTX)  
111 and bone formation markers (P1NP) at the start of the study and subsequently at  
112 six months, one year, one year three months, one year six months, and two years,  
113 totaling six times. Approximately 5ml of blood will be drawn each time.

#### 114 6.2.4 Bone Density Examination:

115 Bone density will be examined at the beginning of the study and then at one  
116 year and two years after medication, totaling three times. The radiation dose for  
117 each bone density examination is approximately 1-5 microsieverts.

#### 118 6.2.5 Newly Occurring Fracture Events During the Follow-up Period:

119 Fracture is defined as any fracture excluding those in the hands, feet, nose, and  
120 skull.

### 121 6.3. Study Procedures

122 (1) Identify suitable participants based on inclusion and exclusion criteria. After  
123 providing detailed explanations, inquire about their willingness to participate in the  
124 study. If agreed, have them sign the informed consent form (as attached).

125 (2) Perform stratified random allocation to determine four groups as illustrated in  
126 the diagram below.

127 (3) Collect blood samples for CTX & P1NP testing before medication, and at six  
128 months, one year, one year three months, one year six months, and two years after  
129 medication.

130 (4) Examine follow-up bone density before medication, and at one year and two  
131 years after medication.

132 (5) Record any side effects and newly occurring fractures during the follow-up  
133 treatment period.

134 (6) Assist in supplementing adequate calcium (800-1000mg/day) and vitamin D  
135 (800 IU/day) during the follow-up period.

136 (7) In case of severe adverse reactions during the study, the participant will  
137 terminate the trial, but monitoring will continue.

138

139 For detailed enrollment procedures, please refer to the diagram below:

140  
141  
142  
143  
144  
145  
146  
147  
148  
149  
150  
151  
152  
153  
154  
155  
156  
157  
158  
159  
160  
161  
162  
163  
164  
165  
166  
167  
168  
169  
170  
171  
172  
173  
174  
175  
176

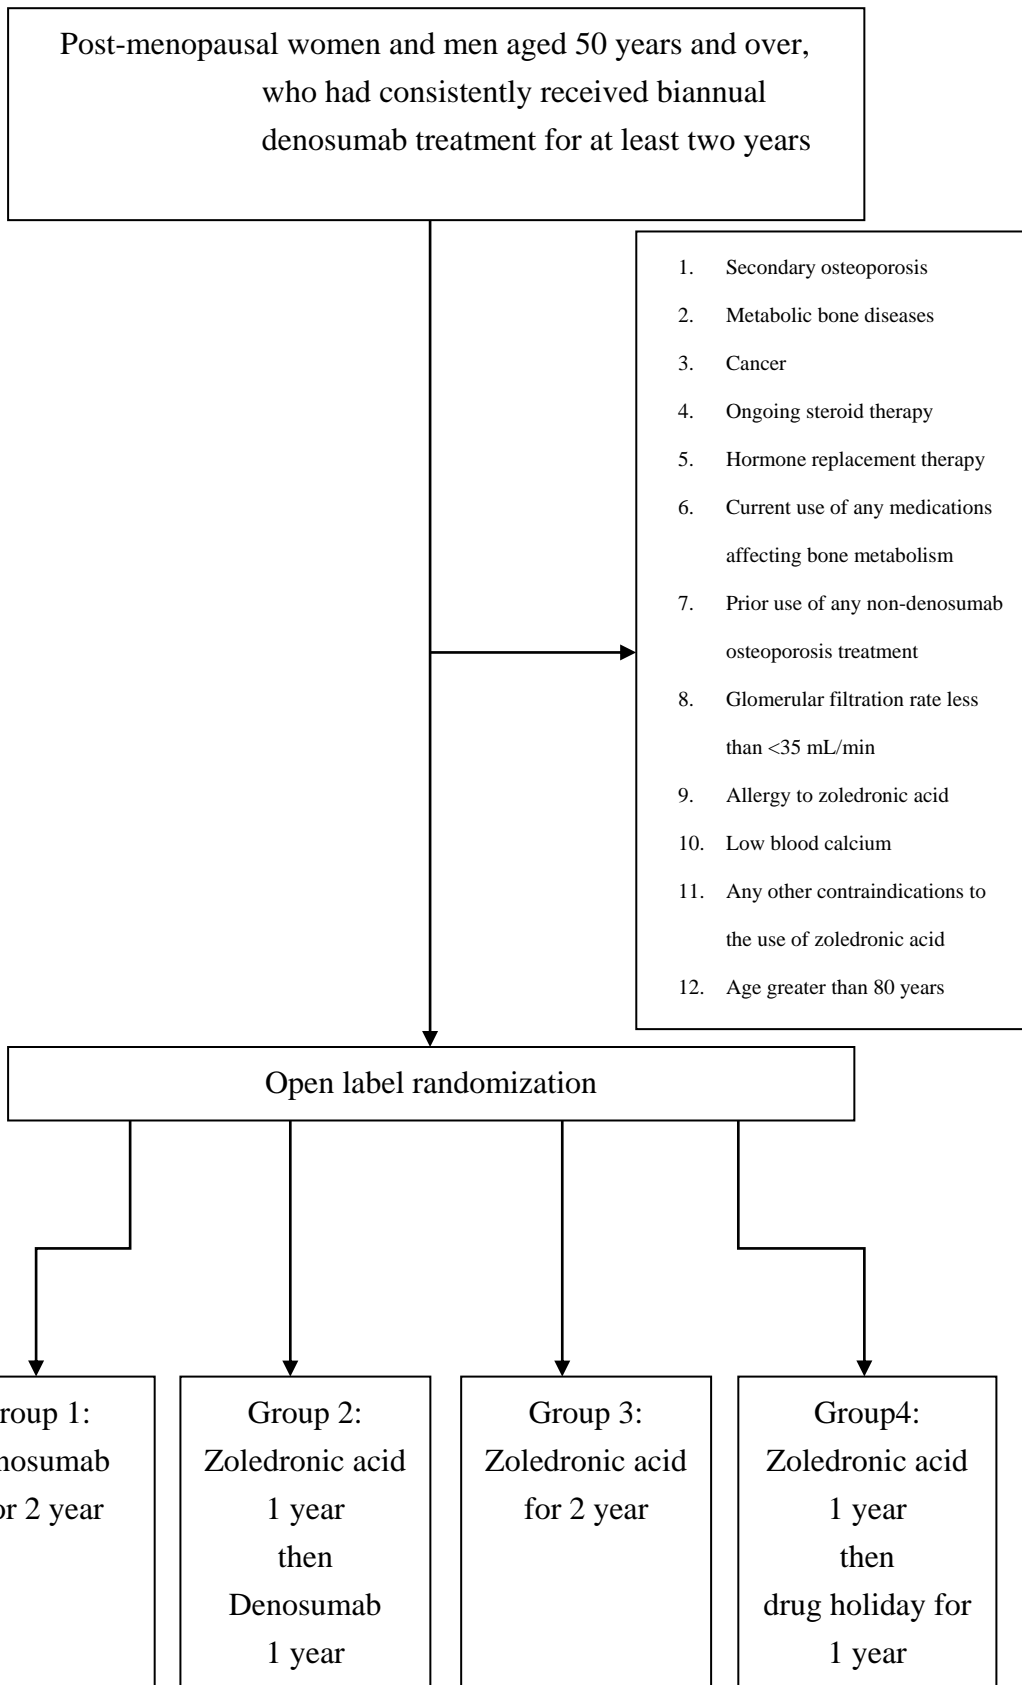

Study flow chart

## 177 6.4 Statistical Analysis

178

## 179 6.4.1 Randomization:

180 This study will employ a stratified randomization method to avoid potential  
 181 uneven distribution of certain characteristics due to a smaller sample size. Patients  
 182 will be stratified based on sex and bone mineral density (the lowest T-score ( $>-2.5$   
 183 or  $\leq-2.5$ )). Randomization will then be conducted within each stratum. The four  
 184 groups in this trial will be randomized in a 1:1:1:1 ratio.

185

## 186 6.4.2 Duration of Study Outcome Follow-up:

187 (1) BMD of lumbar spine, total hip and femoral neck will be measured at baseline,  
 188 12 months and 24 months.

189 (2) CTX and P1NP will be measured at baseline, 6 months, 12 months, 15 months,  
 190 18 months, and 24 months.

191 (3) Subsequent fracture will be recorded during entire follow-up period.

192 Please refer to the table below for the complete follow-up duration.

|                      | Baseline                                                                        | 6m | 12m | 15m | 18m | 24m |
|----------------------|---------------------------------------------------------------------------------|----|-----|-----|-----|-----|
| Basic information    | ✓                                                                               |    |     |     |     |     |
| Bone mineral density | ✓                                                                               |    | ✓   |     |     | ✓   |
| Bone turnover marker | ✓                                                                               | ✓  | ✓   | ✓   | ✓   | ✓   |
| New fracture         | Reporting and documentation are allowed throughout the entire follow-up period. |    |     |     |     |     |
| Side effect          | Reporting and documentation are allowed throughout the entire follow-up period. |    |     |     |     |     |

193

## 194 6.4.3 Dynamic Monitoring and Adjustment of Treatment Strategy for Group Four

195

196 Group Four is designed to observe whether Zoledronic acid can continuously  
 197 prevent bone loss after discontinuation of Denosumab. Current guidelines  
 198 suggest reevaluation of bisphosphonate drugs (including Zoledronic acid) after  
 199 three to five years of treatment, with consideration of a drug holiday for  
 200 low-risk patients. However, there is no consensus on the duration of  
 201 Denosumab treatment. Therefore, this group is set to observe the cessation of  
 202 treatment after two years of Denosumab and one year of Zoledronic acid  
 203 therapy. Previous literature has indicated that the therapeutic effects of

204 Zoledronic acid can last for over 18 months. Hence, after discontinuation, in  
205 addition to continued supplementation of adequate vitamin D and calcium, bone  
206 turnover markers will be actively monitored. If the bone turnover markers  
207 exceed the normal concentrations for typical osteoporosis patients (reference  
208 values: postmenopausal osteoporotic women >0.573 ng/mL; osteoporotic men  
209 >0.584 ng/mL), reinforcement with a dose of Zoledronic acid will be  
210 administered.

211

#### 212 6.4.4 Descriptive Statistics

213

214 Describe the basic characteristic differences among the four study groups.  
215 Chi-square tests will be used for categorical variables, while one-way analysis of  
216 variance (ANOVA) will be used for numerical variables to determine if there are  
217 differences among the groups.

218

219 Statistical Analysis of Research Results:

220 (1) Present the average Bone Mineral Density (BMD) values within each subgroup  
221 at baseline, 12, and 24 months. Utilize one-way ANOVA to investigate whether  
222 there are statistically significant differences in BMD changes (proportions) among  
223 the groups. Additionally, if one-way ANOVA indicates significant differences  
224 between groups, independent t-tests will be performed for pairwise comparisons to  
225 identify which two groups exhibit significant differences. Given that BMD change  
226 values may not follow a normal distribution, Kruskal-Wallis and Wilcoxon  
227 rank-sum tests will also be employed for this analysis.

228

229 (2) Display the average C-terminal telopeptide of type I collagen (CTX) and  
230 Propeptide of procollagen type I (P1NP) values within each subgroup at baseline, 6,  
231 12, 15, 18, and 24 months. Use one-way ANOVA to examine whether there are  
232 statistically significant differences in changes among the groups. Similarly, if  
233 one-way ANOVA indicates significant differences between groups, independent  
234 t-tests will be conducted for pairwise comparisons. Given that hormonal change  
235 values may not follow a normal distribution, Kruskal-Wallis and Wilcoxon  
236 rank-sum tests will be employed for this analysis. Finally, create line graphs  
237 illustrating the long-term changes in CTX and P1NP within each group and use the  
238 Chow test to assess whether there are significant differences in long-term trends  
239 among the groups.

240

241 (3) Record the incidence of new fractures during the follow-up period using  
242 accumulated incidence rate. Analyze differences in incidence rates among the  
243 groups using the log-rank test.

244

245 (4) This study is a two-tailed test, and the significance level is set at 0.05.

246

247 7. Study Period and Progress (anticipated):

248 2019.04~2023.12

249

250 8. Names and Quantities of Required Medications or Medical Devices:

251 - Prolia® (Denosumab) injection (Amgen): Two doses per year

252 - Aclasta® (Zoledronic acid) injection 5mg/100ml (Novartis): One dose per year

253

254 9. Adverse Reactions and Handling in Clinical Setting:

255 Prolia (Denosumab): Possible adverse reactions in clinical settings include back  
256 pain, limb pain, musculoskeletal pain, hypocalcemia, severe infections, skin reactions,  
257 jaw necrosis, and atypical femoral fractures. Participants recruited for this study have  
258 already undergone two years of Prolia (Denosumab) treatment, making them more  
259 tolerant to the drug and reducing the likelihood of common adverse reactions.

260

261 Aclasta (Zoledronic acid): Possible adverse reactions in clinical settings include  
262 musculoskeletal pain, hypocalcemia, jaw necrosis, and atypical femoral fractures.  
263 Participants recruited for this study have only received one year of Aclasta  
264 (Zoledronic acid) treatment, reducing the likelihood of severe adverse reactions such  
265 as jaw necrosis and atypical femoral fractures.

266

267 10. Potential Risks and Benefits to Physical and Mental Health:

268 The medications used in this study are approved by the Ministry of Health and  
269 Welfare for the treatment of osteoporosis. Their safety has been tested globally for  
270 many years, and the risks mentioned above are relatively low compared to their  
271 effectiveness.

272

273 This study provides funding for tracking bone turnover markers and bone mineral  
274 density, enabling participants to monitor changes in treatment effects during the  
275 therapy period. This information serves as a basis for subsequent follow-up and  
276 treatment decisions.

277

278 11. Confidentiality and Privacy Protection of Participant Data:



279        Relevant data from this research project will be encrypted and stored in the  
280        Orthopedic Department of our institution. The principal investigator will be  
281        responsible for destroying the data after the research findings are published.

282        12. Conflict of Interest:

283        This study is self-initiated by the researchers and has no sponsorship from any  
284        company.

285

286        13. Research Personnel and Equipment:

287        Personnel: To be hired.

288        Equipment: Outpatient space at National Taiwan University Hospital, Yunlin  
289        Branch, Hsinchu branch and the imaging department's bone density examination  
290        room.

291

292 14. Funding Requirements:

293

| Project Name                    | Purpose                                                                                                                                                                                                                                                                     | Total Cost |
|---------------------------------|-----------------------------------------------------------------------------------------------------------------------------------------------------------------------------------------------------------------------------------------------------------------------------|------------|
| Personnel Expenses              |                                                                                                                                                                                                                                                                             |            |
| Salary for Part-time Assistants | NT\$480,000 (NT\$10,000/month for a master's level part-time assistant, for 4 years)<br>Labor and Health Insurance Costs (906+794+666)124 = NT\$113,568                                                                                                                     | 593,568    |
| Expert Meetings                 | NT\$2,000 x (4 experts) x 4 sessions = NT\$32,000<br>Unit Supplementary Premium 1.91%:<br>NT\$32,000 x 1.91% = NT\$612                                                                                                                                                      | 32,612     |
| Temporary Wages                 | Wages for specific tasks required for the implementation of this project, limited to hourly pay. Calculated based on the latest hourly minimum wage announced by the Ministry of Labor, NT\$120 per hour. Estimated at NT\$960 per person-day x 70 person-days = NT\$68,160 | 68,160     |
| Participants' Travel Allowance  | Compensation for the time and transportation expenses incurred by participants in the experiment. Estimated at 500 person-times (100 participants x 5 times) x NT\$200 = NT\$100,000                                                                                        | 100,000    |
| Bone Density Examination Fee    | NT\$600 per person x 100 persons x 2 times = NT\$120,000                                                                                                                                                                                                                    | 120,000    |
| Bone Turnover Marker Test Fee   | NT\$1,700 per person x 100 persons x 3 times = NT\$510,000                                                                                                                                                                                                                  | 510,000    |
| Stationery paper                | Expenses for ink, paper, stationery, toner, and other supplies required for the implementation of this project.                                                                                                                                                             | 30,000     |
| Printing:                       | Printing and binding fees for books, research reports, professional education training materials, and photocopying expenses needed for the implementation of this project.                                                                                                  | 40,000     |

|       |           |  |
|-------|-----------|--|
| Total | 1,494,340 |  |
|-------|-----------|--|

294 Total (anticipated):NT\$ 1,494,340 元

295

296 15. Ownership and Utilization of Research and Development Results:

297 The ownership of the research outcomes belongs to National Taiwan University  
 298 Hospital Yunlin Branch. In addition to serving as crucial reference material for future  
 299 clinical treatments, the research team will also compile relevant results into papers for  
 300 presentation at international conferences and publication in academic journals.

301

302 16. Reference :

- 303 1. Freemantle N, Satram-Hoang S, Tang ET, Kaur P, Macarios D, Siddhanti S,  
 304 Borenstein J, Kendler DL; DAPS Investigators. Final results of the DAPS  
 305 (Denosumab Adherence Preference Satisfaction) study: a 24-month, randomized,  
 306 crossover comparison with alendronate in postmenopausal women. Osteoporos  
 307 Int. 2012 Jan;23(1):317-26.
- 308 2. Wang CY, Shau-Huai Fu, Rong-Sen Yang, Fe-Lin Lin Wu, Fei-Yuan Hsiao.  
 309 Epidemiology and Economic Burden of Osteoporosis in Taiwanese Women: A  
 310 Nationwide Study, 2009-2013. 7th Asian Association of Schools of Pharmacy  
 311 (AASP) Conference in Taipei Taiwan, on October 30- November 1, 2015.
- 312 3. Henry G Bone, Rachel B Wagman, Maria L Brandi, Jacques P Brown, Roland  
 313 Chapurlat, Steven R Cummings, Edward Czerwiński, Astrid Fahrleitner-Pammer,  
 314 David L Kendler, Kurt Lippuner, Jean-Yves Reginster, Christian Roux, Jorge  
 315 Malouf, Michelle N Bradley, Nadia S Daizadeh, Andrea Wang, Paula Dakin,  
 316 Nicola Pannacciulli, David W Dempster, Socrates Papapoulos. 10 years of  
 317 denosumab treatment in postmenopausal women with osteoporosis: results from  
 318 the phase 3 randomised FREEDOM trial and open-label extension  
 319 Lancet Diabetes Endocrinol. 2017 Jul;5(7):513-523.
- 320 4. Bone HG, Bolognese MA, Yuen CK, Kendler DL, Miller PD, Yang YC, Grazette  
 321 L, San Martin J, Gallagher JC. Effects of denosumab treatment and  
 322 discontinuation on bone mineral density and bone turnover markers in  
 323 postmenopausal women with low bone mass. J Clin Endocrinol Metab. 2011  
 324 Apr;96(4):972-80.
- 325 5. Karlsson L, Lundkvist J, Psachoulia E, Intorcchia M, Ström O. Persistence with  
 326 denosumab and persistence with oral bisphosphonates for the treatment of  
 327 postmenopausal osteoporosis: a retrospective, observational study, and a  
 328 meta-analysis. Osteoporos Int. 2015 Oct;26(10):2401-11.

- 329 6. Anastasilakis AD, Makras P, Multiple clinical vertebral fractures following  
330 denosumab discontinuation. *Osteoporos Int* 27 (5) (2016) 1929-1930.
- 331 7. Aubry-Rozier B, Gonzalez-Rodriguez E, Stoll D, Lamy O, Severe spontaneous  
332 vertebral fractures after denosumab discontinuation: three case reports,  
333 *Osteoporos Int* 27 (5) (2016) 1923-1925.
- 334 8. Popp AW, Zysset PK, Lippuner K, Rebound-associated vertebral fractures after  
335 discontinuation of denosumab-from clinic and biomechanics, *Osteoporos Int* 27 (5)  
336 (2016) 1917-1921.
- 337 9. Leder BZ, Tsai JN, Uihlein AV, Wallace PM, Lee H, Neer RM et al. Denosumab  
338 and teriparatide transitions in postmenopausal osteoporosis (the DATA-Switch  
339 study): extension of a randomised controlled trial. *The Lancet*  
340 2015;386(9999):1147-55.
- 341 10. Black DM1, Reid IR, Boonen S, Bucci-Rechtweg C, Cauley JA, Cosman F,  
342 Cummings SR, Hue TF, Lippuner K, Lakatos P, Leung PC, Man Z, Martinez RL,  
343 Tan M, Ruzicky ME, Su G, Eastell R. The effect of 3 versus 6 years of zoledronic  
344 acid treatment of osteoporosis: a randomized extension to the HORIZON-Pivotal  
345 Fracture Trial (PFT). *J Bone Miner Res.* 2012 Feb;27(2):243-54.
- 346 11. Black DM1, Reid IR, Cauley JA, Cosman F, Leung PC, Lakatos P, Lippuner K,  
347 Cummings SR, Hue TF, Mukhopadhyay A, Tan M, Aftring RP, Eastell R. The  
348 effect of 6 versus 9 years of zoledronic acid treatment in osteoporosis: a  
349 randomized second extension to the HORIZON-Pivotal Fracture Trial (PFT). *J*  
350 *Bone Miner Res.* 2015 May;30(5):934-44.
- 351 12. V. Z. C. Borba, G. Paz-Filho, C. A. M. Kulak, M. J. Seibe, J. P. Bilezikian. Bone  
352 turnover 18 months after a single intravenous dose of zoledronic acid. *Int J Clin*  
353 *Pract.* 2007 Jun;61(6):1058-62.
- 354 13. Lehmann T, Aeberli D. Possible protective effect of switching from denosumab to  
355 zoledronic acid on vertebral fractures. *Osteoporos Int.* 2017  
356 Oct;28(10):3067-3068.
- 357 14. Reid IR, Horne AM, Mihov B, Gamble GD. Bone Loss After Denosumab: Only  
358 Partial Protection with Zoledronate. *Calcif Tissue Int.* 2017 Oct;101(4):371-374.
- 359 15. Adler RA, El-Hajj Fuleihan G, Bauer DC, Camacho PM, Clarke BL, Clines GA,  
360 Compston JE, Drake MT, Edwards BJ, Favus MJ, Greenspan SL, McKinney R Jr,  
361 Pignolo RJ, Sellmeyer DE. Managing Osteoporosis in Patients on Long-Term  
362 Bisphosphonate Treatment: Report of a Task Force of the American Society for  
363 Bone and Mineral Research. *J Bone Miner Res.* 2016 Jan;31(1):16-35.
