# Supplementary material for: Zoledronate Sequential Therapy After Denosumab Discontinuation to Prevent Bone Mineral Density Reduction: A Randomized Clinical Trial
Source: PubMed Central journal article supplement (PMC11555552; doi:10.1001/jamanetworkopen.2024.43899), 2024-11-11
Supplement: jamanetwopen-e2443899-s002.pdf [file jamanetwopen-e2443899-s002.pdf]

## Supplementary Online Content

Lee CC, Wang CY, Yen HK, et al. Zoledronate sequential therapy after denosumab discontinuation to prevent bone mineral density reduction: a randomized clinical trial. *JAMA Netw Open*. 2024;7(11):e2443899. doi:10.1001/jamanetworkopen.2024.43899

**eFigure.** Flow Chart of the 2-Year Study

**eTable 1.** Results of Stratified Randomization

**eTable 2.** Bone Mineral Density (BMD) Loss in the Lumbar Spine, Total Hip, and Femoral Neck Exceeding the Least Significant Change in the Zoledronate (ZOL) Group

**eTable 3.** Bone Mineral Density (BMD) Changes in Women Who Had Ever Suffered Vertebral Fractures in the Zoledronate (ZOL) Group (n = 63)

This supplementary material has been provided by the authors to give readers additional information about their work.

**eFigure.** Flow Chart of the 2-Year Study

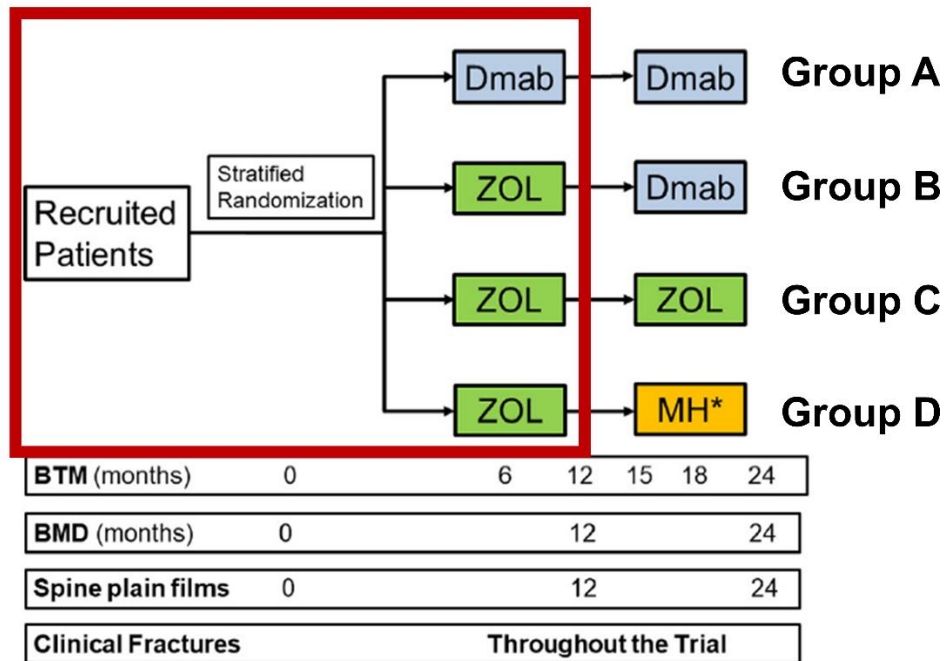

The red frame highlights the first year of the trial.

**Abbreviations:** Dmab, denosumab; ZOL, zoledronate; MH, monitored drug holiday;

BTM, bone turnover markers; BMD, bone mineral density.

\* An extra ZOL injection will be given once the C-terminal telopeptide levels raise above the pre-specified threshold, 0.573 ng/mL in post-menopausal women and 0.584 ng/mL in men, respectively.

**eTable 1.** Results of Stratified Randomization

| Stratification | Stratification | Group | Group | Group | Group | Case number in     |
|----------------|----------------|-------|-------|-------|-------|--------------------|
| by sex         | by T-score     | A     | B     | C     | D     | each stratum       |
| <b>Female</b>  | T-score > -2.5 | 10    | 10    | 11    | 10    | 41                 |
|                | T-score ≤ -2.5 | 13    | 13    | 14    | 14    | 54                 |
| <b>Male</b>    | T-score > -2.5 | 1     | 1     | 0     | 1     | 3                  |
|                | T-score ≤ -2.5 | 1     | 1     | 0     | 1     | 3                  |
|                | Case number    | 25    | 25    | 25    | 26    | Total number = 101 |

**eTable 2.** Bone Mineral Density (BMD) Loss in the Lumbar Spine, Total Hip, and Femoral Neck Exceeding the Least Significant Change in the Zoledronate (ZOL) Group

Least significant change: Lumbar spine >5%, total hip>4%, femoral neck>4%

|                                             | Age<br>(median[IQR]) | Weight<br>(median[IQR]) | BMD change<br>(median[IQR]) |
|---------------------------------------------|----------------------|-------------------------|-----------------------------|
| <b>ALL (n=73)</b>                           |                      |                         |                             |
| LS(n=11)                                    | 73.00[65.00, 75.50]  | 50.00[44.50, 53.35]     | -7.35 [-9.99, -6.69]        |
| TH(n=6)                                     | 67.00[63.75, 70.25]  | 51.25[44.13, 56.50]     | -5.09 [-6.11, -4.31]        |
| FN(n=12)                                    | 73.00[67.75, 78.00]  | 56.00[47.00, 58.50]     | -5.17 [-6.93, -4.99]        |
| <b>Denosumab use for ≤ 2.5 years (n=58)</b> |                      |                         |                             |
| LS(n=5)                                     | 71.00[67.00, 74.00]  | 53.00[52.00, 53.70]     | -7.12 [-7.35, -6.99]        |
| TH(n=4)                                     | 67.00[63.25, 68.75]  | 51.25[46.13, 59.25]     | -5.99 [-6.28, -5.38]        |
| FN(n=9)                                     | 72.00[68.00, 78.00]  | 55.00[47.00, 58.00]     | -5.03 [-8.64, -4.98]        |
| <b>Denosumab use for ≤ 3 years (n=61)</b>   |                      |                         |                             |
| LS(n=6)                                     | 72.50[68.00, 77.75]  | 52.50[48.25, 53.53]     | -7.06 [-7.29, -6.45]        |
| TH(n=4)                                     | 67.00[63.25, 68.75]  | 51.25[46.13, 59.25]     | -5.99 [-6.28, -5.38]        |
| FN(n=9)                                     | 72.00[68.00, 78.00]  | 55.00[47.00, 58.00]     | -5.03[-8.64, -4.98]         |
| <b>Denosumab use for ≥ 3 years (n=15)</b>   |                      |                         |                             |
| LS(n=6)                                     | 73.35[65.50, 76.25]  | 44.50[43.25, 48.75]     | -8.67 [-10.45, -6.76]       |
| TH(n=2)                                     | 68.50[65.75, 71.25]  | 50.00[46.50, 53.50]     | -4.32 [-4.38, -4.26]        |
| FN(n=3)                                     | 74.00[68.50, 76.00]  | 57.00[50.00, 65.50]     | -5.31 [-5.84, -5.17]        |

LS: Lumbar spine; TH: Total hip; FN: Femoral neck

**eTable 3.** Bone Mineral Density (BMD) Changes in Women Who Had Ever Suffered Vertebral Fractures in the Zoledronate (ZOL) Group (n = 63)

|                       | <b>Median [IQR]</b>  |
|-----------------------|----------------------|
| <b>Age (years)</b>    | 71.00 [65.50, 75.50] |
| <b>Weight (kg)</b>    | 57.00 [49.00, 64.00] |
| <b>BMD change (%)</b> |                      |
| <b>LS</b>             | -0.65 [-3.58, 2.68]  |
| <b>TH</b>             | 0.48[-1.43, 2.39]    |
| <b>FN</b>             | 0.81 [-2.53, 3.79]   |

LS: Lumbar spine; TH: Total hip; FN: Femoral neck
