# Supplementary material for: Zoledronate Sequential Therapy After Denosumab Discontinuation to Prevent Bone Mineral Density Reduction: A Randomized Clinical Trial
Source: PubMed Central journal article supplement (PMC11555552; doi:10.1001/jamanetworkopen.2024.43899), 2024-11-11
Supplement: jamanetwopen-e2443899-s003.pdf [file jamanetwopen-e2443899-s003.pdf]

## Data Sharing Statement

Lee. Zoledronate Sequential Therapy After Denosumab Discontinuation to Prevent Bone Mineral Density Reduction. *JAMA Netw Open*. Published November 11, 2024.

doi:10.1001/jamanetworkopen.2024.43899

### Data

**Additional Information:** Denosumab Sequential Therapy (DST), <https://classic.clinicaltrials.gov/ct2/home>, identifier: NCT03868033

**Data available:** No

### Additional Information

**Explanation for why data not available:** The spreading of the data collected in this study are only available from the corresponding author upon reasonable request.
